# Supplementary material for: Differences Between Flash Glucose Monitor and Fingerprick Measurements
Source: Biosensors (Basel). 2018 Oct 17;8(4):93. doi: 10.3390/bios8040093 (PMC6316667; doi:10.3390/bios8040093)
Supplement: Supplementary file 1 [file biosensors-08-00093-s001.csv]

Patient	Timestamp	FL_scanned	fingerpricks
1	2017-05-03 07:43:24	12.3000001907349	11.3440300612199
1	2017-05-03 07:57:24	13.6999998092651	12.3162963604369
1	2017-05-03 08:06:24	13.6000003814697	12.0490463002229
1	2017-05-03 08:15:24	12.8999996185303	11.6544400706087
1	2017-05-03 08:26:24	12.1000003814697	11.0804599499109
1	2017-05-03 08:35:24	11.6999998092651	10.9184316423079
1	2017-05-03 08:45:24	11.3999996185303	10.9555195168054
1	2017-05-03 08:56:24	11.1000003814697	10.5693289469631
1	2017-05-03 09:09:24	10.1999998092651	9.50003358255742
1	2017-05-03 09:19:24	9.39999961853027	8.34894158662267
1	2017-05-03 09:30:24	7.90000009536743	7.16185970723828
1	2017-05-03 09:40:24	6.69999980926514	6.22846302338972
1	2017-05-03 09:50:24	5.80000019073486	5.19616695346884
1	2017-05-03 10:00:24	4.69999980926514	4.48607983054483
1	2017-05-03 10:10:24	4	4.49606270691919
1	2017-05-03 10:20:24	4.40000009536743	5.02786141384532
1	2017-05-03 10:30:24	5.19999980926514	6.11898751849691
1	2017-05-03 10:40:24	6.40000009536743	6.94337751522421
1	2017-05-03 10:50:24	7.09999990463257	7.1461562810644
1	2017-05-03 10:59:24	7.5	7.16725203428074
1	2017-05-03 11:10:24	7.40000009536743	7.42040141190506
1	2017-05-03 11:22:24	7.80000019073486	8.26050130373121
1	2017-05-03 11:34:24	9.10000038146973	9.28987089561478
1	2017-05-03 11:45:24	10.1000003814697	10.1741602187501
1	2017-05-03 11:55:24	10.8999996185303	10.9184739889485
2	2017-05-03 07:47:00	13.6000003814697	12.5268872208661
2	2017-05-03 08:16:00	13.3000001907349	12.72968801688
2	2017-05-03 09:07:00	11.1000003814697	10.9220293250436
2	2017-05-03 09:39:00	8.69999980926514	9.03998081299072
2	2017-05-03 09:48:00	8.30000019073486	8.74044580397677
2	2017-05-03 10:18:00	6.90000009536743	7.04417761384208
2	2017-05-03 10:38:00	6.09999990463257	6.30735163243265
2	2017-05-03 10:41:00	5.90000009536743	6.14062979186534
3	2017-05-04 07:17:24	12.1000003814697	9.6248798593734
3	2017-05-04 07:29:24	12.1999998092651	10.2170116398055
3	2017-05-04 07:40:24	11.8000001907349	9.85873647035317
3	2017-05-04 07:49:24	11.6999998092651	9.51817415974384
3	2017-05-04 07:59:24	11.5	9.15158606009681
3	2017-05-04 08:10:24	10.8000001907349	8.52699332871263
3	2017-05-04 08:20:24	9.89999961853027	7.64545612426407
3	2017-05-04 08:31:24	8.60000038146973	6.68262090567048
3	2017-05-04 08:40:24	8	5.69839093315711
3	2017-05-04 08:51:24	6.30000019073486	4.55842307003578
3	2017-05-04 09:03:24	5.09999990463257	4.48774219969383
3	2017-05-04 09:15:24	5.5	4.77794768699342
3	2017-05-04 09:26:24	6.30000019073486	5.32538208000153
3	2017-05-04 09:35:24	6.69999980926514	5.73252389448406
3	2017-05-04 09:45:24	7	6.24624126483703
3	2017-05-04 09:55:24	7.90000009536743	7.26342205598485
3	2017-05-04 10:09:24	10.1999998092651	8.66075590878424
3	2017-05-04 10:20:24	11.1999998092651	9.56910756633122
3	2017-05-04 10:30:24	12.1000003814697	10.1467782861584
3	2017-05-04 10:41:24	12.8000001907349	10.4810746073838
3	2017-05-04 10:52:24	13.1999998092651	10.6647619950059
4	2017-05-04 07:00:09	7.59999990463257	8.21595083345979
4	2017-05-04 07:10:09	6.19999980926514	7.11572295853216
4	2017-05-04 07:20:09	5.09999990463257	6.11727688468314
4	2017-05-04 07:31:09	4.59999990463257	5.63662947014335
4	2017-05-04 07:40:09	4.09999990463257	5.34700664848043
4	2017-05-04 07:51:09	3.70000004768372	4.93422679041867
4	2017-05-04 08:01:09	3.40000009536743	4.22751823955877
4	2017-05-04 08:11:09	3.09999990463257	4.08341137289124
4	2017-05-04 08:20:09	3.09999990463257	4.54624223874754
4	2017-05-04 08:30:09	4.40000009536743	5.83977932363748
4	2017-05-04 08:41:09	6.30000019073486	7.03310452535112
4	2017-05-04 08:52:09	6.80000019073486	7.42402439595668
4	2017-05-04 09:01:09	6.90000009536743	7.48411774031993
4	2017-05-04 09:11:09	6.59999990463257	7.28976767448275
4	2017-05-04 09:21:09	6.5	7.30088944172646
4	2017-05-04 09:30:09	6.19999980926514	7.29276724450907
4	2017-05-04 09:41:09	6.19999980926514	7.09454226964599
4	2017-05-04 09:52:09	6.69999980926514	8.13752596218936
4	2017-05-04 10:01:09	7.90000009536743	9.68991973199402
4	2017-05-04 10:10:09	9.19999980926514	10.7095708358288
4	2017-05-04 10:23:09	11.3000001907349	10.9145351267657
4	2017-05-04 10:34:09	11.6999998092651	10.5628098087851
4	2017-05-04 10:55:09	7.69999980926514	5.98925157646179
5	2017-05-05 07:21:12	5.30000019073486	5.40916049680699
5	2017-05-05 07:30:12	5.30000019073486	5.77239852342468
5	2017-05-05 07:40:12	5.40000009536743	5.52854790084698
5	2017-05-05 07:50:12	5.19999980926514	5.19149427126485
5	2017-05-05 08:00:12	4.90000009536743	4.74570386623461
5	2017-05-05 08:10:12	4.80000019073486	4.44416664694972
5	2017-05-05 08:20:12	4.59999990463257	5.05770089665765
5	2017-05-05 08:30:12	5.09999990463257	6.13570411284551
5	2017-05-05 08:41:12	6.30000019073486	6.65510438603023
5	2017-05-05 08:51:12	6.90000009536743	7.51310720364044
5	2017-05-05 09:00:12	8	7.71668299972942
5	2017-05-05 09:12:12	8.10000038146973	7.60146892069799
5	2017-05-05 09:21:12	8.19999980926514	7.94928228750041
5	2017-05-05 09:30:12	8.80000019073486	8.58587541141769
5	2017-05-05 09:41:12	9.39999961853027	9.26983450712627
5	2017-05-05 09:55:12	10	8.93489384559096
5	2017-05-05 10:06:12	9.5	8.19865942764743
5	2017-05-05 10:17:12	8.89999961853027	8.3011069459725
5	2017-05-05 10:22:12	8.89999961853027	8.69406103612088
5	2017-05-05 10:28:12	9.19999980926514	9.29261614980735
5	2017-05-05 10:38:12	10.3999996185303	10.2953601383092
5	2017-05-05 10:50:12	12	11.3546870291543
5	2017-05-05 10:58:12	12.8999996185303	11.6087259084614
5	2017-05-05 11:10:12	12.1000003814697	11.1362806892331
5	2017-05-05 11:23:12	11.1999998092651	10.0700792803023
5	2017-05-05 11:35:12	9.80000019073486	9.15061473760931
5	2017-05-05 11:45:12	9.19999980926514	8.74388418320687
5	2017-05-05 11:56:12	8.19999980926514	8.49887547874243
5	2017-05-05 12:09:12	7.5	8.03981824941315
5	2017-05-05 12:16:12	7.59999990463257	7.82577244035509
6	2017-05-05 07:23:02	10.3999996185303	8.78175623493044
6	2017-05-05 07:34:02	9.10000038146973	8.51501866976906
6	2017-05-05 07:45:02	8.30000019073486	8.23789196161066
6	2017-05-05 07:55:02	8.10000038146973	7.77336673646732
6	2017-05-05 08:05:02	7.80000019073486	7.7341680291524
6	2017-05-05 08:15:02	7.40000009536743	7.33984092816545
6	2017-05-05 08:25:02	7	6.64734867850905
6	2017-05-05 08:35:02	6.59999990463257	6.31676329845048
6	2017-05-05 08:47:02	6.09999990463257	5.92766810190975
6	2017-05-05 08:58:02	5.30000019073486	5.27988656097591
6	2017-05-05 09:09:02	4.69999980926514	4.29853428336702
6	2017-05-05 09:18:02	3.90000009536743	3.9237658267124
6	2017-05-05 09:29:02	3.79999995231628	5.04454784877814
6	2017-05-05 09:39:02	5.30000019073486	6.52019065949953
6	2017-05-05 09:53:02	7.80000019073486	8.91708227496535
6	2017-05-05 10:04:02	9.10000038146973	10.6331842469061
6	2017-05-05 10:15:02	9.80000019073486	9.84303983782037
6	2017-05-05 10:25:02	9.89999961853027	9.41499514115839
6	2017-05-05 10:35:02	10.6000003814697	9.81507903065628
6	2017-05-05 10:46:02	10.8999996185303	9.68932251772972
6	2017-05-05 10:56:02	10.8000001907349	9.13834097986664
6	2017-05-05 11:08:02	10.1000003814697	8.66189761228429
6	2017-05-05 11:21:02	8.69999980926514	7.98597768114664
6	2017-05-05 11:33:02	8.30000019073486	7.29857567024393
6	2017-05-05 11:43:03	7.30000019073486	7.23336064651591
6	2017-05-05 11:54:02	6.59999990463257	7.44350285181526
6	2017-05-05 12:05:02	7.69999980926514	8.43321263949509
7	2017-05-16 07:09:15	11.6999998092651	11.2802998479256
7	2017-05-16 07:22:15	11.3000001907349	11.1978125456974
7	2017-05-16 07:35:15	11.1999998092651	11.3940375647656
7	2017-05-16 07:43:15	11.3000001907349	11.2968438699445
7	2017-05-16 07:54:15	11.3000001907349	10.9839809748677
7	2017-05-16 08:05:15	11.1999998092651	10.6841049927054
7	2017-05-16 08:15:15	11.1000003814697	10.802982839749
7	2017-05-16 08:25:15	10.8000001907349	10.8201772406466
7	2017-05-16 08:35:15	10.6000003814697	10.5083293674137
7	2017-05-16 08:45:15	10.1000003814697	10.2337925079477
7	2017-05-16 08:54:15	9.89999961853027	10.0725302904607
7	2017-05-16 09:06:15	9.5	9.65815241356262
7	2017-05-16 09:15:15	9.19999980926514	9.17881311340327
7	2017-05-16 09:30:15	8.19999980926514	8.61654921611891
7	2017-05-16 09:45:15	7.69999980926514	8.00839694651529
7	2017-05-16 10:00:15	7.30000019073486	7.01039225502878
7	2017-05-16 10:13:15	5.80000019073486	6.45841742952518
7	2017-05-16 10:23:15	5.40000009536743	5.9186819508439
7	2017-05-16 10:33:15	5.19999980926514	5.66548404604991
7	2017-05-16 10:43:15	4.90000009536743	5.96307290627186
7	2017-05-16 10:52:15	5.59999990463257	7.22565945023284
7	2017-05-16 11:04:15	8.30000019073486	9.59646919870696
7	2017-05-16 11:13:15	10.8000001907349	11.0336807930435
7	2017-05-16 11:24:15	12.3999996185303	11.7066603721061
7	2017-05-16 11:33:15	12.6999998092651	11.5279446706104
7	2017-05-16 11:44:15	11.8000001907349	11.4344934370338
7	2017-05-16 11:55:15	11.8000001907349	11.3691483118098
7	2017-05-16 12:06:15	11.1999998092651	10.7044285905467
7	2017-05-16 12:16:15	10.3999996185303	9.95408675680746
7	2017-05-16 12:25:15	9.69999980926514	9.34699542334698
8	2017-05-18 07:16:12	3.79999995231628	3.59018929939621
8	2017-05-18 07:21:12	3.70000004768372	3.69990878751456
8	2017-05-18 07:25:12	3.79999995231628	4.20563177046899
8	2017-05-18 07:27:12	3.90000009536743	4.53087410476375
8	2017-05-18 07:33:12	4.80000019073486	5.63645630010645
8	2017-05-18 07:38:12	5.5	6.56169599171427
8	2017-05-18 07:45:12	7.30000019073486	7.56240300613153
8	2017-05-18 07:48:12	7.90000009536743	7.81259360845128
8	2017-05-18 07:54:12	8.30000019073486	8.06580131179924
8	2017-05-18 07:57:12	8.69999980926514	8.17625312735036
8	2017-05-18 08:07:12	9.60000038146973	8.93074394672237
8	2017-05-18 08:08:12	9.69999980926514	9.02762758630189
8	2017-05-18 08:19:12	10.8999996185303	9.86190488771756
8	2017-05-18 08:27:12	11.3999996185303	10.0447490797687
8	2017-05-18 08:30:12	11.5	10.0826974159318
8	2017-05-18 08:34:12	11.6000003814697	10.1437485777292
8	2017-05-18 08:41:12	11.6000003814697	10.2063049459289
8	2017-05-18 08:49:12	11.1000003814697	9.95153966697327
8	2017-05-18 09:00:12	10.3999996185303	9.00080457798206
8	2017-05-18 09:04:12	10.1000003814697	8.62392142586812
8	2017-05-18 09:11:12	9.30000019073486	7.95316646236653
8	2017-05-18 09:13:12	9.10000038146973	7.74495569874784
8	2017-05-18 09:21:12	7.90000009536743	6.80335425352716
8	2017-05-18 09:30:12	6.59999990463257	5.73664733201135
8	2017-05-18 09:32:12	6.30000019073486	5.55460539701876
8	2017-05-18 09:40:12	5.69999980926514	5.1761257723119
8	2017-05-18 09:43:12	5.19999980926514	5.1766076134921
8	2017-05-18 09:48:12	5	5.28495271810195
8	2017-05-18 09:50:12	4.90000009536743	5.34856190388553
8	2017-05-18 10:00:12	5.5	5.92280947254606
8	2017-05-18 10:11:12	6.80000019073486	7.22254974488135
8	2017-05-18 10:16:12	7.69999980926514	7.67391148820826
8	2017-05-18 10:21:12	8.19999980926514	7.95890601999828
8	2017-05-18 10:31:12	9.30000019073486	8.15700068840925
8	2017-05-18 10:41:12	9.30000019073486	7.94570430499879
8	2017-05-18 10:49:12	8.60000038146973	7.82813301752159
8	2017-05-18 10:51:12	8.30000019073486	7.86797149558745
8	2017-05-18 10:56:12	8.10000038146973	8.10411272855511
8	2017-05-18 11:01:12	7.80000019073486	8.45115846741524
8	2017-05-18 11:09:12	8.30000019073486	9.02076239224943
8	2017-05-18 11:11:12	8.5	9.15375128069437
8	2017-05-18 11:15:12	9	9.38697436010442
8	2017-05-18 11:22:12	9.69999980926514	9.56048783703093
8	2017-05-18 11:26:12	9.89999961853027	9.47325520231641
8	2017-05-18 11:31:12	10.3000001907349	9.22510202239027
8	2017-05-18 11:43:12	10.1999998092651	9.04738854901831
8	2017-05-18 11:45:12	9.89999961853027	9.19641436318652
8	2017-05-18 11:50:12	10.1000003814697	9.74966932209295
9	2017-05-18 07:11:17	13.6000003814697	12.2073628294914
9	2017-05-18 07:19:17	12.8000001907349	10.5642572973769
9	2017-05-18 07:29:17	12.3000001907349	9.95076913486764
9	2017-05-18 07:39:17	11.6999998092651	10.01884667185
9	2017-05-18 07:49:17	11.1000003814697	10.010965656341
9	2017-05-18 08:01:17	10.3999996185303	9.11661967667186
9	2017-05-18 08:11:17	9.60000038146973	8.05056944938307
9	2017-05-18 08:20:17	8.60000038146973	7.54612487303667
9	2017-05-18 08:31:17	7.59999990463257	7.07524082926612
9	2017-05-18 08:41:17	6.80000019073486	6.37197795322442
9	2017-05-18 08:51:17	5.90000009536743	5.58495838799153
9	2017-05-18 09:01:17	4.90000009536743	4.79220447428296
9	2017-05-18 09:12:17	4.30000019073486	4.9301776649426
9	2017-05-18 09:22:17	3.90000009536743	6.27225502842796
9	2017-05-18 09:31:17	4.80000019073486	7.37054240138304
9	2017-05-18 09:41:17	5.69999980926514	7.94034108549068
9	2017-05-18 09:51:17	6.80000019073486	7.95481055531104
9	2017-05-18 10:02:17	7.30000019073486	7.61533545753581
9	2017-05-18 10:11:17	7.19999980926514	7.09024003219705
9	2017-05-18 10:21:17	6.69999980926514	6.5656798003856
9	2017-05-18 10:33:17	6.30000019073486	6.62935179382391
9	2017-05-18 10:42:17	6.19999980926514	6.4702342271411
9	2017-05-18 10:53:17	5.69999980926514	5.53445935404212
9	2017-05-18 11:02:17	5	4.85247815136773
9	2017-05-18 11:13:17	4.30000019073486	4.94262525020073
9	2017-05-18 11:22:17	4.09999990463257	5.79061584515101
9	2017-05-18 11:30:17	4.5	6.64626144691536
9	2017-05-18 11:41:17	5.80000019073486	7.16544532479628
9	2017-05-18 11:52:17	6.69999980926514	6.88438131787289
10	2017-05-19 07:12:04	13.6999998092651	13.7753302537858
10	2017-05-19 07:23:04	13.1000003814697	14.7387611948567
10	2017-05-19 07:33:04	13.1999998092651	14.2035057294837
10	2017-05-19 07:44:04	13.1999998092651	13.4714607570421
10	2017-05-19 07:55:04	12.6999998092651	13.1794220682866
10	2017-05-19 08:05:04	12.3999996185303	13.0272753398936
10	2017-05-19 08:16:04	11.8999996185303	12.9288744499169
10	2017-05-19 08:26:04	11.5	12.492292990309
10	2017-05-19 08:36:04	10.8000001907349	11.507793772326
10	2017-05-19 08:46:04	9.89999961853027	10.3419596573591
10	2017-05-19 08:56:04	9.19999980926514	9.738466745086
10	2017-05-19 09:06:04	7.90000009536743	9.17424472031469
10	2017-05-19 09:16:04	6.80000019073486	8.48028915382968
10	2017-05-19 09:29:04	5.09999990463257	7.41268086971211
10	2017-05-19 09:41:04	4.40000009536743	6.06197295570596
10	2017-05-19 09:51:04	3.90000009536743	5.13694398937508
10	2017-05-19 10:00:04	3.5	5.9439777109176
10	2017-05-19 10:10:04	4.19999980926514	7.63128708498459
10	2017-05-19 10:20:04	6.40000009536743	8.58641642363226
10	2017-05-19 10:31:04	7.90000009536743	9.94344883244864
10	2017-05-19 10:40:04	9.19999980926514	11.6089623891828
10	2017-05-19 10:50:04	10.8999996185303	12.863397358913
10	2017-05-19 11:04:04	11.6000003814697	13.2358462407804
10	2017-05-19 11:13:04	11.6999998092651	12.7241580229618
10	2017-05-19 11:23:04	10.6000003814697	11.5439643274535
10	2017-05-19 11:38:04	8.60000038146973	9.31279752250824
10	2017-05-19 11:52:04	6.80000019073486	7.48846305971013
10	2017-05-19 12:03:04	5	5.98387442088358
11	2017-05-19 07:14:04	6.80000019073486	7.26079392455672
11	2017-05-19 07:23:04	6.80000019073486	8.06567967008625
11	2017-05-19 07:33:04	7.80000019073486	9.98210981267987
11	2017-05-19 07:43:04	9.80000019073486	11.1448148907297
11	2017-05-19 07:54:04	10.8000001907349	11.3761927011769
11	2017-05-19 08:05:04	11.3000001907349	11.1190723950516
11	2017-05-19 08:16:04	11.1000003814697	10.5039141353602
11	2017-05-19 08:26:04	10.6000003814697	9.59920914261586
11	2017-05-19 08:36:04	10	8.79230463709762
11	2017-05-19 08:46:04	8.69999980926514	8.05148791258184
11	2017-05-19 08:56:04	7.59999990463257	6.95753804104706
11	2017-05-19 09:06:04	6.19999980926514	5.71708721218727
11	2017-05-19 09:16:04	5.19999980926514	4.87906130023894
11	2017-05-19 09:27:04	4.19999980926514	4.87728068544753
11	2017-05-19 09:37:04	4.30000019073486	5.10065545697798
11	2017-05-19 09:41:04	4.59999990463257	5.42381932266376
11	2017-05-19 09:48:04	4.69999980926514	6.32942595104782
11	2017-05-19 09:57:04	5.69999980926514	7.16128754681267
11	2017-05-19 10:07:04	6.5	6.95678593584482
11	2017-05-19 10:18:04	7.19999980926514	8.35127007345863
12	2017-05-30 06:57:09	11.3999996185303	11.057601921554
12	2017-05-30 07:07:09	11.1000003814697	11.1630839982206
12	2017-05-30 07:16:09	11.1000003814697	10.4352511547357
12	2017-05-30 07:27:09	10.6999998092651	10.0351063848627
12	2017-05-30 07:37:09	10.1999998092651	9.66491059142376
12	2017-05-30 07:47:09	9.10000038146973	8.67776759915017
12	2017-05-30 07:59:09	7.59999990463257	7.12212024235711
12	2017-05-30 08:09:09	6.40000009536743	6.00865203175178
12	2017-05-30 08:19:09	5.09999990463257	5.03970520895043
12	2017-05-30 08:27:09	4.5	4.4770729447182
12	2017-05-30 08:39:09	3.79999995231628	4.77063903322422
12	2017-05-30 08:49:09	4.09999990463257	6.03310746431047
12	2017-05-30 08:59:09	5.30000019073486	7.50353901098481
12	2017-05-30 09:08:09	7.09999990463257	8.2640666005259
12	2017-05-30 09:21:09	8.69999980926514	8.63636856845187
12	2017-05-30 09:32:09	8.89999961853027	8.57725000769164
12	2017-05-30 09:42:09	8.5	8.74574131003095
12	2017-05-30 09:54:09	8.80000019073486	9.54476577692551
12	2017-05-30 10:04:09	9.39999961853027	9.94369280991922
12	2017-05-30 10:17:09	9.69999980926514	9.40088917696018
12	2017-05-30 10:29:09	9.10000038146973	8.34347490055992
12	2017-05-30 10:39:09	8.19999980926514	7.29341103794109
12	2017-05-30 10:49:09	7	6.03332700498734
13	2017-05-30 06:57:07	12.3999996185303	11.5972276857003
13	2017-05-30 07:08:07	13	11.7063309394966
13	2017-05-30 07:18:07	12.3999996185303	11.3549496075665
13	2017-05-30 07:28:07	11.3999996185303	10.7043611955684
13	2017-05-30 07:39:07	10.8999996185303	10.1276287533017
13	2017-05-30 07:49:07	10.1000003814697	9.58563357369435
13	2017-05-30 07:59:07	9	8.76146704896905
13	2017-05-30 08:09:07	7.90000009536743	7.52290711792101
13	2017-05-30 08:20:07	6.69999980926514	6.49608915299103
13	2017-05-30 08:29:07	5.69999980926514	5.61611333216344
13	2017-05-30 08:39:07	4.40000009536743	4.53504383632361
13	2017-05-30 08:49:07	4	4.24003540687096
13	2017-05-30 08:59:07	4.09999990463257	5.20106264426824
13	2017-05-30 09:10:07	5.5	6.62483440069074
13	2017-05-30 09:23:07	6.69999980926514	6.71639663225335
13	2017-05-30 09:32:07	7.09999990463257	6.74485507017898
13	2017-05-30 09:44:07	7.40000009536743	8.15968020434064
13	2017-05-30 09:54:07	8.30000019073486	9.10434454895248
13	2017-05-30 10:07:07	9.10000038146973	9.4487533924672
13	2017-05-30 10:19:07	10.1000003814697	9.69363408150799
13	2017-05-30 10:30:07	10.3999996185303	9.94840395110785
13	2017-05-30 10:41:07	9.80000019073486	9.03927528591771
13	2017-05-30 10:51:07	9.19999980926514	7.52156712254711
13	2017-05-30 11:03:07	7.90000009536743	6.63053881424666
13	2017-05-30 11:14:07	6.90000009536743	6.32823477630172
13	2017-05-30 11:24:07	5.69999980926514	5.50905129411042
14	2017-05-30 07:17:23	12.1000003814697	11.7427133122869
14	2017-05-30 07:27:23	11.8999996185303	12.3378659293825
14	2017-05-30 07:41:23	11.8999996185303	11.5996126432558
14	2017-05-30 07:50:23	10.8000001907349	10.5006860773436
14	2017-05-30 08:01:23	9.69999980926514	9.71524334814955
14	2017-05-30 08:10:23	8.80000019073486	9.4196908293096
14	2017-05-30 08:20:23	8	8.83786887378453
14	2017-05-30 08:31:23	7.40000009536743	7.83984729907772
14	2017-05-30 08:43:23	6.5	7.18433295384246
14	2017-05-30 08:53:23	5.30000019073486	6.49514025827673
14	2017-05-30 09:04:23	4.80000019073486	5.25471815759516
14	2017-05-30 09:15:23	4	4.12373863927507
14	2017-05-30 09:29:23	3.40000009536743	4.03922286156912
14	2017-05-30 09:45:23	3.70000004768372	5.17091334692343
14	2017-05-30 09:57:23	4.80000019073486	6.06292652502114
14	2017-05-30 10:08:23	5.69999980926514	5.96002726853179
14	2017-05-30 10:21:23	7	7.46676105314103
14	2017-05-30 10:32:23	7.40000009536743	7.99854565452821
14	2017-05-30 10:43:23	7.90000009536743	7.26114528369798
14	2017-05-30 10:55:23	7	6.42335657649949
14	2017-05-30 11:00:23	7	6.422913574401
14	2017-05-30 11:10:23	6	6.83526462290333
14	2017-05-30 11:22:23	6.40000009536743	7.54696961941007
14	2017-05-30 11:35:23	8.10000038146973	8.66465485229346
14	2017-05-30 11:45:23	8.10000038146973	8.68850964375648
14	2017-05-30 11:57:23	8.5	8.38668205822611
14	2017-05-30 12:06:23	8.19999980926514	8.17261725996788
14	2017-05-30 12:15:23	7.40000009536743	7.81038817567233
14	2017-05-30 12:26:23	7.19999980926514	7.21527179350513
14	2017-05-30 12:36:23	6.40000009536743	6.67441188602394
15	2017-05-31 07:10:17	7.80000019073486	7.29825128593417
15	2017-05-31 07:21:17	6.90000009536743	7.40176666287068
15	2017-05-31 07:30:17	7.09999990463257	8.05025145958985
15	2017-05-31 07:40:17	7.90000009536743	8.82313674434566
15	2017-05-31 07:51:17	9.30000019073486	9.00177200570928
15	2017-05-31 08:00:17	8.89999961853027	9.21987816971187
15	2017-05-31 08:10:17	9.39999961853027	9.51888207178748
15	2017-05-31 08:22:17	8.69999980926514	9.74983823159176
15	2017-05-31 08:31:17	9.69999980926514	9.19069628464308
15	2017-05-31 08:47:17	7.90000009536743	6.70442042712829
15	2017-05-31 08:57:17	6.69999980926514	5.32687395755096
15	2017-05-31 09:05:17	5.59999990463257	4.87558278077945
15	2017-05-31 09:15:17	4.30000019073486	5.79067028329717
15	2017-05-31 09:26:17	5.5	8.08801336990607
15	2017-05-31 09:37:17	8.60000038146973	9.92875381826142
15	2017-05-31 09:47:17	10.3999996185303	10.8838974229392
16	2017-05-31 07:08:28	11.5	10.5661784768322
16	2017-05-31 07:18:28	11.6000003814697	10.8351351483969
16	2017-05-31 07:29:28	11.6999998092651	11.5258017533583
16	2017-05-31 07:40:28	11.6000003814697	11.6597319763035
16	2017-05-31 07:50:28	11.1999998092651	11.3514245182175
16	2017-05-31 08:00:28	10.5	10.9482588268951
16	2017-05-31 08:05:28	10.5	10.7113470897912
16	2017-05-31 08:07:28	10.3999996185303	10.6179135096911
16	2017-05-31 08:11:28	10.1999998092651	10.4467499923079
16	2017-05-31 08:20:28	9.60000038146973	10.0812910595177
16	2017-05-31 08:31:28	8.5	9.29424674062113
16	2017-05-31 08:32:28	8.39999961853027	9.205108968057
16	2017-05-31 08:42:28	7.59999990463257	8.33176045644236
16	2017-05-31 08:52:28	7.09999990463257	7.60951031851095
16	2017-05-31 09:02:28	6.5	7.01035043596863
16	2017-05-31 09:15:28	5.69999980926514	6.58106327052207
16	2017-05-31 09:21:28	5.59999990463257	6.29191122083139
16	2017-05-31 09:23:28	5.40000009536743	6.17089703371124
16	2017-05-31 09:34:28	4.80000019073486	5.31784093260707
16	2017-05-31 09:36:28	4.80000019073486	5.13855514842363
16	2017-05-31 09:49:01	3.79999995231628	4.4051183859873
16	2017-05-31 09:49:01	3.79999995231628	4.4051183859873
16	2017-05-31 09:58:28	3.70000004768372	4.92717804172978
16	2017-05-31 10:02:28	3.5	5.3651494938609
16	2017-05-31 10:11:28	4.59999990463257	6.55198827867765
16	2017-05-31 10:18:28	5.90000009536743	7.56007685711054
16	2017-05-31 10:22:28	6.59999990463257	8.0996654555703
16	2017-05-31 10:29:28	7.09999990463257	8.84332202110274
16	2017-05-31 10:33:28	7.59999990463257	9.10622810402403
16	2017-05-31 10:40:28	8.10000038146973	9.25489194774002
16	2017-05-31 10:42:28	8.19999980926514	9.23367461997071
16	2017-05-31 10:43:28	8.19999980926514	9.21432537120979
16	2017-05-31 10:51:28	8.39999961853027	8.90000322980315
16	2017-05-31 10:53:28	8.5	8.78957561552199
16	2017-05-31 11:04:28	7.90000009536743	8.08085702369395
16	2017-05-31 11:09:28	7.69999980926514	7.71033110990526
16	2017-05-31 11:14:28	7.30000019073486	7.26315444735068
16	2017-05-31 11:24:28	5.69999980926514	6.16251066352976
17	2017-06-01 07:09:21	6.80000019073486	6.14608761186278
17	2017-06-01 07:19:21	6.90000009536743	7.12272970747611
17	2017-06-01 07:31:21	8.39999961853027	9.49185738728668
17	2017-06-01 07:40:21	11	10.4680275104272
17	2017-06-01 07:50:21	12.5	10.952116937107
17	2017-06-01 08:01:21	12.8000001907349	11.1144156106167
17	2017-06-01 08:10:21	12.6000003814697	10.7814866690696
17	2017-06-01 08:24:21	10.8999996185303	9.68494802100874
17	2017-06-01 08:34:21	10	8.76381693409369
17	2017-06-01 08:45:21	8.69999980926514	7.53746579088821
17	2017-06-01 08:56:21	6.69999980926514	6.25336298611698
17	2017-06-01 09:06:21	5.80000019073486	5.27788675439666
17	2017-06-01 09:15:21	5.09999990463257	4.46299322791388
17	2017-06-01 09:26:21	4.09999990463257	3.98132461267769
17	2017-06-01 09:36:21	3.90000009536743	4.64187290867397
17	2017-06-01 09:46:21	5.09999990463257	5.71359179286342
17	2017-06-01 09:56:21	6.69999980926514	6.05354662132221
17	2017-06-01 10:07:21	6.19999980926514	5.84195165371324
17	2017-06-01 10:21:21	7.30000019073486	7.00980452055635
17	2017-06-01 10:33:21	9.80000019073486	9.16458785951725
17	2017-06-01 10:42:21	11.1999998092651	9.90398154979521
17	2017-06-01 10:52:21	12.1999998092651	10.092642047589
18	2017-06-01 07:11:06	9.10000038146973	10.0008349623459
18	2017-06-01 07:22:06	8.80000019073486	9.32613350066835
18	2017-06-01 07:32:06	8.19999980926514	8.79662330568372
18	2017-06-01 07:42:06	7.69999980926514	8.4433267259715
18	2017-06-01 07:53:06	7.09999990463257	8.13441384851014
18	2017-06-01 08:03:06	6.69999980926514	7.71103121021478
18	2017-06-01 08:14:06	6.40000009536743	7.2423614114695
18	2017-06-01 08:30:06	5.90000009536743	6.57856660785945
18	2017-06-01 08:45:06	4.59999990463257	5.5773769707629
18	2017-06-01 08:55:06	3.79999995231628	5.22953931683523
18	2017-06-01 09:05:06	3.59999990463257	5.01370274375164
18	2017-06-01 09:17:06	3.29999995231628	4.67119956134027
18	2017-06-01 09:27:06	3	4.91582292938586
18	2017-06-01 09:37:06	2.90000009536743	5.65500989642461
18	2017-06-01 09:47:06	4.09999990463257	6.60520216097849
18	2017-06-01 09:58:06	4.69999980926514	7.27301890019523
18	2017-06-01 10:09:06	5	7.62574315807353
18	2017-06-01 10:22:06	6.19999980926514	7.82308564292871
18	2017-06-01 10:34:06	6.59999990463257	8.40422480164368
18	2017-06-01 10:43:06	7	9.13910562637799
18	2017-06-01 10:54:06	7.40000009536743	9.74970698510024
18	2017-06-01 11:05:06	7.80000019073486	10.0216972119497
18	2017-06-01 11:19:06	8.60000038146973	10.3591433189387
18	2017-06-01 11:33:06	8.60000038146973	10.3189924872156
18	2017-06-01 11:44:06	8.10000038146973	9.95081428853573
18	2017-06-01 11:58:06	9.10000038146973	9.13012934952198
18	2017-06-01 12:10:06	7.69999980926514	7.9054074177467
18	2017-06-01 12:25:06	5.80000019073486	7.18967953252622
18	2017-06-01 12:36:06	5.30000019073486	6.78218566530394
18	2017-06-01 12:46:06	5.19999980926514	6.41329584894029
19	2017-06-02 07:00:26	13.6999998092651	13.4371949935155
19	2017-06-02 07:11:26	13.8000001907349	13.0652446837455
19	2017-06-02 07:22:26	13.3999996185303	13.0964131100799
19	2017-06-02 07:34:26	12.6999998092651	12.3886274561955
19	2017-06-02 07:44:26	12.1999998092651	11.6080835663235
19	2017-06-02 07:55:26	11.5	11.1691529215211
19	2017-06-02 08:07:26	10.8999996185303	10.7505096671558
19	2017-06-02 08:16:26	10.1999998092651	10.1246982614219
19	2017-06-02 08:26:26	9.30000019073486	9.17482634922628
19	2017-06-02 08:36:26	8.39999961853027	8.17555848754013
19	2017-06-02 08:47:26	7.30000019073486	7.45346538374535
19	2017-06-02 08:59:26	6.09999990463257	7.064846546009
19	2017-06-02 09:10:26	5.40000009536743	6.24030187513303
19	2017-06-02 09:22:26	4.90000009536743	5.42126335463968
19	2017-06-02 09:31:26	4.40000009536743	4.77227410854223
19	2017-06-02 09:48:26	3.59999990463257	5.03453585334963
19	2017-06-02 10:01:26	5.09999990463257	7.16474101096099
19	2017-06-02 10:12:26	7.40000009536743	8.55067761375128
19	2017-06-02 10:27:26	9.69999980926514	10.2299382033129
19	2017-06-02 10:45:26	11.1999998092651	11.065894712716
19	2017-06-02 10:57:26	10.8000001907349	10.4267237836924
19	2017-06-02 11:08:26	11.1000003814697	10.5704372517831
19	2017-06-02 11:22:26	11.5	10.8766015076622
19	2017-06-02 11:36:26	11.1999998092651	10.7531512865167
19	2017-06-02 11:50:26	10.1000003814697	9.93291759917671
19	2017-06-02 12:02:26	9.30000019073486	8.85378527913451
19	2017-06-02 12:17:26	8.19999980926514	7.79730876663427
19	2017-06-02 12:27:26	7.09999990463257	6.93125027779146
19	2017-06-02 12:38:26	6	5.93923369267407
19	2017-06-02 12:48:26	4.59999990463257	6.26415008184731
20	2017-06-02 07:21:25	10.3999996185303	12.3028156232513
20	2017-06-02 07:33:25	10	11.9075277092598
20	2017-06-02 07:45:25	9.19999980926514	11.2422742985287
20	2017-06-02 08:00:25	8.30000019073486	10.1548705747649
20	2017-06-02 08:13:25	7.30000019073486	8.98861167159745
20	2017-06-02 08:25:25	6.30000019073486	7.711934781631
20	2017-06-02 08:35:25	5.59999990463257	6.81784339011689
20	2017-06-02 08:45:25	4.40000009536743	5.95263221018103
20	2017-06-02 08:55:25	3.90000009536743	5.14320038651112
20	2017-06-02 09:05:25	3.40000009536743	4.44690582408151
20	2017-06-02 09:19:25	2.5	4.40632996048292
20	2017-06-02 09:31:25	2.5	5.20241790840635
20	2017-06-02 09:45:25	4	6.221928458286
20	2017-06-02 09:58:25	4.80000019073486	6.01561270160854
20	2017-06-02 10:11:25	3.70000004768372	4.90986044711596
20	2017-06-02 10:25:25	3.09999990463257	5.65397375409479
20	2017-06-02 10:39:25	4.09999990463257	6.28157354948588
20	2017-06-02 10:53:25	4.59999990463257	6.86457210272768
20	2017-06-02 11:07:25	4.90000009536743	7.12708921687592
20	2017-06-02 11:21:25	5.59999990463257	6.90420312047367
20	2017-06-02 11:35:25	6.40000009536743	9.2414533608781
20	2017-06-02 11:51:25	8.80000019073486	11.5807838851799
20	2017-06-02 12:02:25	10	12.1623727106893
20	2017-06-02 12:15:25	9.89999961853027	11.7891888749415
20	2017-06-02 12:24:25	9.69999980926514	11.4446718987481
21	2017-06-02 06:53:02	5.69999980926514	4.88533694138564
21	2017-06-02 07:02:02	5.30000019073486	5.36078402542425
21	2017-06-02 07:04:02	5.30000019073486	5.71259566224978
21	2017-06-02 07:16:02	6.90000009536743	8.25019044502308
21	2017-06-02 07:17:02	7.09999990463257	8.4621454328312
21	2017-06-02 07:28:02	10.1000003814697	10.4240610864775
21	2017-06-02 07:39:02	13	11.440169583603
21	2017-06-02 07:51:02	13.8000001907349	11.8676274461796
21	2017-06-02 08:01:02	13.8000001907349	11.7890283566022
21	2017-06-02 08:11:02	13.3999996185303	11.2341836682771
21	2017-06-02 08:22:02	12.3999996185303	10.1700829531701
21	2017-06-02 08:32:02	11.6000003814697	8.86572329032913
21	2017-06-02 08:41:02	10.3000001907349	7.9512081629965
21	2017-06-02 08:50:02	9	7.21267113594893
21	2017-06-02 09:00:02	7.80000019073486	6.10242869858801
21	2017-06-02 09:11:02	6.19999980926514	4.64384929688651
21	2017-06-02 09:23:02	4.59999990463257	3.90651511323008
21	2017-06-02 09:34:02	4.19999980926514	4.95726694188312
21	2017-06-02 09:46:02	5.40000009536743	6.7048170084256
21	2017-06-02 10:00:02	7.59999990463257	7.25923525625244
21	2017-06-02 10:11:02	8.10000038146973	6.84944737625026
21	2017-06-02 10:26:02	7.30000019073486	7.28669677568522
21	2017-06-02 10:36:02	7.69999980926514	8.26240909968484
21	2017-06-02 10:46:02	8.19999980926514	8.5052357610602
21	2017-06-02 10:56:02	9.10000038146973	8.88529392852486
21	2017-06-02 11:06:02	9.80000019073486	9.57814594467344
22	2017-06-13 07:12:10	6.40000009536743	7.67207606755293
22	2017-06-13 07:23:10	6.80000019073486	8.05069471387284
22	2017-06-13 07:35:10	7.40000009536743	8.26706934720119
22	2017-06-13 07:47:10	6.69999980926514	7.30690072804602
22	2017-06-13 07:59:10	5.5	5.71305377691106
22	2017-06-13 08:09:10	4.5	4.45068825375005
22	2017-06-13 08:21:10	3.5	4.3178371302531
22	2017-06-13 08:30:10	3.20000004768372	4.76885790151245
22	2017-06-13 08:44:10	3.90000009536743	5.38674385905478
22	2017-06-13 08:55:10	4.30000019073486	5.47992255350533
22	2017-06-13 09:05:10	4.09999990463257	5.05401686792637
22	2017-06-13 09:20:10	3.90000009536743	5.12516874734432
22	2017-06-13 09:34:10	5	6.40067063081389
22	2017-06-13 09:46:10	5.90000009536743	7.38404305809151
22	2017-06-13 10:00:10	6.40000009536743	7.67353744509875
22	2017-06-13 10:10:10	6.40000009536743	7.6034331213388
22	2017-06-13 10:21:10	6.30000019073486	7.40528402769263
22	2017-06-13 10:34:10	6.09999990463257	8.0639026506922
22	2017-06-13 10:46:10	7.19999980926514	9.89494931895532
22	2017-06-13 10:58:10	9.80000019073486	11.1702941573613
22	2017-06-13 11:09:10	10.3000001907349	10.9729804005847
22	2017-06-13 11:18:10	9.80000019073486	10.4837938290668
22	2017-06-13 11:29:10	8.69999980926514	10.2829197118609
22	2017-06-13 11:40:10	8.39999961853027	9.89833713611458
22	2017-06-13 11:51:10	7.59999990463257	8.77485360561203
22	2017-06-13 12:00:10	6.69999980926514	7.838802449745
22	2017-06-13 12:15:10	5.30000019073486	6.26276213162597
22	2017-06-13 12:25:10	4.5	5.60728165044634
22	2017-06-13 12:35:10	4	5.03838934947726
22	2017-06-13 12:45:10	3.5	4.24129448003169
23	2017-06-14 06:43:28	13.6999998092651	12.8046829495331
23	2017-06-14 06:55:28	12.1999998092651	12.103703437897
23	2017-06-14 07:10:28	11.5	11.7605793660564
23	2017-06-14 07:23:28	11.1999998092651	11.5240006090469
23	2017-06-14 07:32:28	10.8999996185303	11.1781856607745
23	2017-06-14 07:43:28	10.3999996185303	10.7525628416364
23	2017-06-14 07:54:28	10.1000003814697	10.4314302458161
23	2017-06-14 08:06:28	9.69999980926514	10.0336431632612
23	2017-06-14 08:17:28	8.89999961853027	9.44376853019975
23	2017-06-14 08:29:28	8.69999980926514	8.74516052268979
23	2017-06-14 08:41:28	8.19999980926514	8.01940018561785
23	2017-06-14 08:56:28	7.09999990463257	7.44333357434832
23	2017-06-14 09:09:28	6.19999980926514	6.772603767555
23	2017-06-14 09:20:28	5.40000009536743	5.94615922806561
23	2017-06-14 09:31:28	4.5	5.11243165537443
23	2017-06-14 09:42:28	3.79999995231628	4.39902037642789
23	2017-06-14 09:54:28	3.29999995231628	4.20371048664222
23	2017-06-14 10:04:28	3.09999990463257	5.22851163597281
23	2017-06-14 10:17:28	5.59999990463257	8.01644878483791
23	2017-06-14 10:27:28	6.80000019073486	9.38192996626645
23	2017-06-14 10:38:28	8.39999961853027	10.0939277914935
23	2017-06-14 10:47:28	9.10000038146973	10.7593029392887
23	2017-06-14 11:02:28	11.3999996185303	12.4126854038482
23	2017-06-14 11:16:28	13.3999996185303	13.67736812142
23	2017-06-14 11:29:28	13.8000001907349	14.1595383952701
23	2017-06-14 11:44:28	14.3999996185303	14.7096533112357
23	2017-06-14 11:59:28	15	14.5473832752351
23	2017-06-14 12:10:28	14.6999998092651	13.8229845742056
23	2017-06-14 12:22:28	13.3999996185303	13.0401251211092
23	2017-06-14 12:32:28	12.3999996185303	12.4029433965433
24	2017-06-14 07:01:10	4.69999980926514	5.89170504657748
24	2017-06-14 07:16:10	4.80000019073486	7.05542126761439
24	2017-06-14 07:31:10	6.40000009536743	8.06521915157429
24	2017-06-14 07:44:10	7.59999990463257	7.93303165450468
24	2017-06-14 08:01:10	7.40000009536743	8.01270650633571
24	2017-06-14 08:10:10	7.40000009536743	8.22753020177323
24	2017-06-14 08:20:10	7.59999990463257	8.82212296793793
24	2017-06-14 08:31:10	8.5	9.29638631016609
24	2017-06-14 08:32:10	8.60000038146973	9.34937170355376
24	2017-06-14 08:41:10	9.39999961853027	10.0148255018339
24	2017-06-14 08:50:10	9.89999961853027	10.6462351173232
24	2017-06-14 09:06:10	11	10.7164915879211
24	2017-06-14 09:21:10	10.6999998092651	10.923432423123
24	2017-06-14 09:30:10	10.8999996185303	10.7386392250818
24	2017-06-14 09:43:10	10.3000001907349	10.4831082171602
24	2017-06-14 09:57:10	10	10.5667118475999
24	2017-06-14 10:12:10	9.60000038146973	9.79028729374576
24	2017-06-14 10:27:10	8.39999961853027	8.60709529269628
24	2017-06-14 10:39:10	8.10000038146973	7.7305279983772
24	2017-06-14 10:52:10	7.30000019073486	7.17759145065779
24	2017-06-14 11:09:10	5.80000019073486	6.04069590241483
24	2017-06-14 11:19:10	4.90000009536743	5.39735672606976
24	2017-06-14 11:28:10	4.40000009536743	4.77785866625529
24	2017-06-14 11:41:10	3.5	5.03219238096349
24	2017-06-14 11:54:10	4.90000009536743	6.39138222670173
24	2017-06-14 12:07:10	6.69999980926514	7.35954044337597
24	2017-06-14 12:22:10	8.30000019073486	8.7538128290401
24	2017-06-14 12:34:10	8.60000038146973	10.107382537196
25	2017-06-14 07:01:28	11.8999996185303	12.3282874144929
25	2017-06-14 07:13:28	12.3999996185303	12.2929616220145
25	2017-06-14 07:29:28	11.6999998092651	11.5672201267291
25	2017-06-14 07:42:28	10.6000003814697	11.1356539384751
25	2017-06-14 07:55:28	9.5	10.0348942036467
25	2017-06-14 08:08:28	8.39999961853027	8.54897393877604
25	2017-06-14 08:17:28	7.69999980926514	7.66899838472395
25	2017-06-14 08:27:28	6.80000019073486	6.64101160026517
25	2017-06-14 08:39:28	5.5	5.6183701820109
25	2017-06-14 08:50:28	4.59999990463257	4.96565425727844
25	2017-06-14 09:04:28	3.90000009536743	4.41423376064088
25	2017-06-14 09:17:28	3.70000004768372	4.89341470643904
25	2017-06-14 09:30:28	5.09999990463257	6.43416649330445
25	2017-06-14 09:43:28	6.69999980926514	8.09247725954877
25	2017-06-14 09:56:28	8.69999980926514	9.07101495481677
25	2017-06-14 10:07:28	9.89999961853027	10.0636526062827
25	2017-06-14 10:21:28	11.1000003814697	11.0692763367702
25	2017-06-14 10:34:28	11.1000003814697	11.2320778323028
25	2017-06-14 10:48:28	11.3000001907349	10.6228430762025
25	2017-06-14 11:00:28	10.3999996185303	9.99134881526613
25	2017-06-14 11:13:28	8.69999980926514	8.74311391920024
25	2017-06-14 11:26:28	7.19999980926514	7.45718534385877
25	2017-06-14 11:37:28	6.30000019073486	6.59560138655392
25	2017-06-14 11:50:28	4.90000009536743	5.34181539797919
25	2017-06-14 12:00:28	4.19999980926514	4.52130155131168
26	2017-06-15 07:06:06	11.3999996185303	9.31043449950098
26	2017-06-15 07:17:06	9	9.25734312381075
26	2017-06-15 07:28:06	8.19999980926514	8.58832946720085
26	2017-06-15 07:39:06	7.40000009536743	7.91442792769468
26	2017-06-15 07:49:06	6.80000019073486	7.63985167139463
26	2017-06-15 08:00:06	5.69999980926514	7.42893859847395
26	2017-06-15 08:11:06	5.09999990463257	7.10365956233778
26	2017-06-15 08:22:06	4.80000019073486	6.45845919392481
26	2017-06-15 08:33:06	4.80000019073486	5.95149572381402
26	2017-06-15 08:43:06	4.80000019073486	5.04521634039195
26	2017-06-15 08:55:06	4.5	5.6320531094052
26	2017-06-15 09:06:06	5.30000019073486	8.02935925697523
26	2017-06-15 09:17:06	6.69999980926514	9.85440526516067
26	2017-06-15 09:23:06	7.69999980926514	10.3997458262965
26	2017-06-15 09:29:06	8.30000019073486	10.6681836859991
26	2017-06-15 09:38:06	9.60000038146973	10.5869038071283
26	2017-06-15 09:49:06	9.69999980926514	10.0374602062879
26	2017-06-15 10:00:06	8.80000019073486	9.51561419869497
26	2017-06-15 10:10:06	7.90000009536743	8.72925517963071
26	2017-06-15 10:24:06	5.90000009536743	6.84345429192104
26	2017-06-15 10:34:06	4.90000009536743	5.66840014968633
26	2017-06-15 10:44:06	4.19999980926514	4.44925143175459
27	2017-06-15 07:08:15	8.39999961853027	9.71267076996544
27	2017-06-15 07:22:15	8.69999980926514	10.1673800050347
27	2017-06-15 07:35:15	7.90000009536743	9.84969686915455
27	2017-06-15 07:47:15	7.90000009536743	9.43782874250011
27	2017-06-15 08:00:15	7.40000009536743	9.07834082128527
27	2017-06-15 08:14:15	6.90000009536743	8.58402120141053
27	2017-06-15 08:27:15	6	8.03499570356268
27	2017-06-15 08:41:15	5.5	7.46509389839585
27	2017-06-15 08:55:15	4.69999980926514	6.64329216322771
27	2017-06-15 09:07:15	4.09999990463257	5.91371069966875
27	2017-06-15 09:20:15	3.59999990463257	5.18069961252495
27	2017-06-15 09:30:15	3.29999995231628	4.58623022899227
27	2017-06-15 09:43:15	2.90000009536743	4.38941105872879
27	2017-06-15 09:56:15	3	5.19197974906785
27	2017-06-15 10:11:15	4.30000019073486	5.99016816392751
27	2017-06-15 10:25:15	5.5	7.01879979981525
27	2017-06-15 10:40:15	5.30000019073486	6.89368077602048
27	2017-06-15 10:54:15	5.19999980926514	6.98640090525106
27	2017-06-15 11:09:15	5.19999980926514	7.38847051121339
27	2017-06-15 11:21:15	5.19999980926514	7.64706919123927
27	2017-06-15 11:33:15	5.59999990463257	8.06255338916866
27	2017-06-15 11:46:15	6.09999990463257	8.48740526297056
27	2017-06-15 11:59:15	6.40000009536743	8.45223573494412
27	2017-06-15 12:11:15	6.69999980926514	8.1410878189854
27	2017-06-15 12:24:00	7.19999980926514	8.89965412552876
27	2017-06-15 12:35:15	7.40000009536743	8.94303363313077
28	2017-06-16 06:56:25	7.59999990463257	7.8434845386905
28	2017-06-16 07:08:25	7.30000019073486	8.90787351103797
28	2017-06-16 07:16:25	7.69999980926514	9.64991067778866
28	2017-06-16 07:26:25	8.89999961853027	10.2429433786966
28	2017-06-16 07:36:25	9.39999961853027	10.1056789798725
28	2017-06-16 07:46:25	9.39999961853027	9.49273667424125
28	2017-06-16 07:59:25	8.5	8.99230523015443
28	2017-06-16 08:09:25	8	8.47529014191723
28	2017-06-16 08:20:25	7.59999990463257	7.57544816237931
28	2017-06-16 08:31:25	6.40000009536743	6.50524120272355
28	2017-06-16 08:41:25	5.69999980926514	5.38028261232583
28	2017-06-16 08:49:25	5	4.62811673046279
28	2017-06-16 09:00:25	3.90000009536743	3.97869303681166
28	2017-06-16 09:11:25	3.40000009536743	4.11371094047195
28	2017-06-16 09:22:25	3.29999995231628	4.95768637338735
28	2017-06-16 09:35:25	5.30000019073486	6.47082807198596
28	2017-06-16 09:45:25	5.40000009536743	7.19598375527423
28	2017-06-16 09:54:25	6.40000009536743	8.14363336518125
28	2017-06-16 10:05:25	7.5	8.88240971211624
28	2017-06-16 10:16:25	7.69999980926514	9.11888536725386
28	2017-06-16 10:28:25	8.5	9.18593864795258
28	2017-06-16 10:38:25	7.5	9.51915246916528
28	2017-06-16 10:50:25	8	9.19736397260007
28	2017-06-16 11:03:25	7.90000009536743	8.13083178710746
28	2017-06-16 11:14:25	6.5	6.6771980381308
28	2017-06-16 11:24:25	5.40000009536743	4.60231464237596
29	2017-06-26 07:08:02	9.10000038146973	9.89787062250168
29	2017-06-26 07:19:02	7.90000009536743	9.84580341640376
29	2017-06-26 07:30:02	7.40000009536743	8.65159042542403
29	2017-06-26 07:42:02	6.59999990463257	6.88776582575826
29	2017-06-26 07:51:02	5.80000019073486	6.5351970074646
29	2017-06-26 08:01:02	5.09999990463257	6.07133553455792
29	2017-06-26 08:11:02	4.19999980926514	4.6951883192501
29	2017-06-26 08:26:02	3.40000009536743	3.71207987543059
29	2017-06-26 08:38:02	3.09999990463257	6.97496285827038
29	2017-06-26 08:51:02	5.59999990463257	10.2789255674277
29	2017-06-26 08:52:02	5.80000019073486	10.4262184142512
29	2017-06-26 09:01:02	7.09999990463257	11.1648950764482
29	2017-06-26 09:15:02	9	11.5804414912035
29	2017-06-26 09:26:02	9.69999980926514	12.0775914128696
29	2017-06-26 09:37:02	10.1999998092651	12.3248529908029
29	2017-06-26 09:50:02	10.8000001907349	12.4728000889112
29	2017-06-26 10:05:02	11.6000003814697	12.4479944964005
29	2017-06-26 10:16:02	11.6000003814697	11.9218775844769
29	2017-06-26 10:31:02	11.1000003814697	11.6774966233111
29	2017-06-26 10:43:02	11.1000003814697	11.4354422921074
29	2017-06-26 10:54:02	10.6000003814697	10.3928986141235
29	2017-06-26 11:13:02	8.39999961853027	7.87214431678389
29	2017-06-26 11:24:02	6.59999990463257	6.34550209545004
30	2017-06-27 07:25:18	8.39999961853027	7.85264917594656
30	2017-06-27 07:36:18	8.30000019073486	7.42962037054824
30	2017-06-27 07:49:18	7.19999980926514	6.34572595555723
30	2017-06-27 08:01:18	6.30000019073486	5.71991877153163
30	2017-06-27 08:12:18	4.69999980926514	4.74218889590472
30	2017-06-27 08:23:18	3.70000004768372	3.8278276704985
30	2017-06-27 08:34:18	3.90000009536743	4.1094515777037
30	2017-06-27 08:45:18	4.80000019073486	5.25400291850251
30	2017-06-27 08:58:18	6.59999990463257	7.33044591547258
30	2017-06-27 09:07:18	7	6.83750830228519
30	2017-06-27 09:19:18	7.19999980926514	6.45120606027233
30	2017-06-27 09:30:18	6.80000019073486	6.27731701382687
30	2017-06-27 09:39:18	7.19999980926514	6.5076385421317
30	2017-06-27 09:50:18	8.60000038146973	8.19314440788236
30	2017-06-27 10:01:18	9.30000019073486	9.33453027455222
30	2017-06-27 10:13:18	10.1000003814697	10.3378183554879
30	2017-06-27 10:27:18	11.8999996185303	11.6059691795182
30	2017-06-27 10:41:18	13.3000001907349	11.7650223470637
30	2017-06-27 10:53:18	13.6000003814697	11.6042229057674
30	2017-06-27 11:05:18	12.6000003814697	10.7566882681586
30	2017-06-27 11:17:18	10.3999996185303	8.98642118174909
30	2017-06-27 11:29:18	8.19999980926514	7.06283711007122
30	2017-06-27 11:40:18	5.59999990463257	5.27066438682059
30	2017-06-27 11:50:18	4.19999980926514	4.18951886133631
31	2017-06-27 06:56:20	19.7000007629395	18.3509017673255
31	2017-06-27 07:09:20	19.5	16.8274067228178
31	2017-06-27 07:21:20	18.3999996185303	15.4957893736543
31	2017-06-27 07:34:20	17	14.897465996469
31	2017-06-27 07:45:20	15.8999996185303	14.4239537869672
31	2017-06-27 07:55:20	15.1000003814697	13.8011233247175
31	2017-06-27 08:08:20	13.6000003814697	12.8166903037689
31	2017-06-27 08:19:20	12.3999996185303	11.8806513840506
31	2017-06-27 08:32:20	11.6999998092651	11.2297589550299
31	2017-06-27 08:42:20	10.8999996185303	10.7672132148629
31	2017-06-27 08:55:20	9.89999961853027	9.93359976668632
31	2017-06-27 09:06:20	9.19999980926514	8.92272432217712
31	2017-06-27 09:22:20	7.90000009536743	7.29707009674748
31	2017-06-27 09:30:20	7.09999990463257	6.77057509161323
31	2017-06-27 09:45:20	5.80000019073486	5.92647717068744
31	2017-06-27 09:56:20	5.19999980926514	5.26072025629878
31	2017-06-27 10:05:20	4.59999990463257	4.85151282283952
31	2017-06-27 10:19:20	4.09999990463257	5.33629437561536
31	2017-06-27 10:32:20	7.90000009536743	7.79641396170106
31	2017-06-27 10:43:20	10.1000003814697	9.95618413971589
31	2017-06-27 10:54:20	12.1000003814697	11.5649883843407
31	2017-06-27 11:06:20	13.8000001907349	12.4896512994178
31	2017-06-27 11:19:20	15.1999998092651	13.0140858260827
31	2017-06-27 11:28:20	15.8999996185303	13.9184548911937
31	2017-06-27 11:40:20	16.1000003814697	14.2819340707536
31	2017-06-27 11:50:20	15.5	14.0886846004994
31	2017-06-27 12:02:20	15.1999998092651	14.2323969675685
31	2017-06-27 12:13:20	14.6000003814697	13.9490819942759
31	2017-06-27 12:24:20	13.8999996185303	12.9344590770112
32	2017-06-27 07:15:00	6.69999980926514	7.41522033228396
32	2017-06-27 07:26:00	7.40000009536743	8.13076880690889
32	2017-06-27 07:37:00	8.69999980926514	8.61729695375562
32	2017-06-27 07:47:00	8.89999961853027	8.94438619788716
32	2017-06-27 08:00:00	9.19999980926514	8.92760805697188
32	2017-06-27 08:17:00	9.30000019073486	7.78014012248537
32	2017-06-27 08:26:00	8.39999961853027	7.13352185584284
32	2017-06-27 08:37:00	6.80000019073486	6.31515256103664
32	2017-06-27 08:47:00	5.69999980926514	5.4582050497062
32	2017-06-27 08:59:00	5.40000009536743	5.03308291934269
32	2017-06-27 09:09:00	5.09999990463257	6.1024763656204
32	2017-06-27 09:20:00	7.09999990463257	8.01769585054547
32	2017-06-27 09:32:00	9.80000019073486	9.25096185254529
32	2017-06-27 09:41:00	10.8999996185303	9.70531347023554
32	2017-06-27 09:54:00	12.8000001907349	11.7228140595376
33	2017-06-27 07:03:07	5.30000019073486	6.20449900923548
33	2017-06-27 07:16:07	4.5	7.86918003637626
33	2017-06-27 07:29:07	7.30000019073486	9.19624137411527
33	2017-06-27 07:40:07	8.39999961853027	10.0077535801386
33	2017-06-27 07:52:07	8.69999980926514	9.80310096239976
33	2017-06-27 08:03:07	7.80000019073486	8.9976816003813
33	2017-06-27 08:16:07	6.19999980926514	7.4724619177226
33	2017-06-27 08:26:07	5	6.01335440195247
33	2017-06-27 08:36:07	4	4.88761334398139
33	2017-06-27 08:46:07	3.29999995231628	4.46219994346331
33	2017-06-27 08:59:07	3.29999995231628	5.14517908569158
33	2017-06-27 09:11:07	4.59999990463257	6.23869011315816
33	2017-06-27 09:24:07	6.19999980926514	7.16496479493993
33	2017-06-27 09:36:07	6.30000019073486	7.30580806707983
33	2017-06-27 09:49:07	6.69999980926514	7.72029368538863
33	2017-06-27 10:01:07	6.5	8.53818338077471
33	2017-06-27 10:12:07	7.90000009536743	9.87843344249566
33	2017-06-27 10:22:07	9.89999961853027	11.642780609351
34	2017-06-28 07:00:23	12.6000003814697	13.8316756466514
34	2017-06-28 07:11:23	12.8000001907349	11.6549007492531
34	2017-06-28 07:20:23	12.8000001907349	12.3065638679787
34	2017-06-28 07:31:23	12.8000001907349	12.4181098866181
34	2017-06-28 07:42:23	12.6000003814697	11.8420696474569
34	2017-06-28 07:53:23	12.3999996185303	11.9012141882547
34	2017-06-28 08:03:23	11.8999996185303	11.2828559134261
34	2017-06-28 08:14:23	11.6999998092651	10.0259098562913
34	2017-06-28 08:24:23	11.1999998092651	9.92435505129993
34	2017-06-28 08:38:23	10.6000003814697	9.66397237318557
34	2017-06-28 08:49:23	9.69999980926514	8.16140618929083
34	2017-06-28 09:00:23	8.69999980926514	7.16414955600952
34	2017-06-28 09:09:23	8.19999980926514	7.20572939661493
34	2017-06-28 09:24:23	6.80000019073486	6.30119795314402
34	2017-06-28 09:34:23	5.90000009536743	5.25865238976847
34	2017-06-28 09:44:23	5.19999980926514	4.53029556728766
34	2017-06-28 09:56:23	4.19999980926514	4.1979252478907
34	2017-06-28 10:07:23	3.79999995231628	4.71132100474507
34	2017-06-28 10:18:23	4.09999990463257	5.51435344379454
34	2017-06-28 10:26:23	4.69999980926514	6.17035435852335
34	2017-06-28 10:38:23	6	7.15432772534558
34	2017-06-28 10:50:23	7.09999990463257	8.22155025802465
34	2017-06-28 10:59:23	7.59999990463257	8.72855267555518
34	2017-06-28 11:10:23	8.30000019073486	8.87411320393756
34	2017-06-28 11:19:23	8.60000038146973	9.34422171321895
34	2017-06-28 11:33:23	9.10000038146973	10.0372998795891
34	2017-06-28 11:45:23	9.10000038146973	9.01989920335954
34	2017-06-28 11:54:23	8.89999961853027	8.24647024006197
34	2017-06-28 12:04:23	8	6.96435142503427
34	2017-06-28 12:14:23	7.09999990463257	4.45371386605734
35	2017-06-28 07:11:03	7.59999990463257	6.07415901574332
35	2017-06-28 07:23:03	7.59999990463257	7.23274532548769
35	2017-06-28 07:31:03	9.19999980926514	8.77745586966115
35	2017-06-28 07:34:03	9.80000019073486	9.23300606252786
35	2017-06-28 07:37:03	10.6999998092651	9.5832820595431
35	2017-06-28 07:42:03	12.1999998092651	9.95680595381515
35	2017-06-28 07:45:03	12.6999998092651	10.087086691627
35	2017-06-28 07:52:03	13.1999998092651	10.2190094303787
35	2017-06-28 07:57:03	13.6000003814697	10.1899408029573
35	2017-06-28 08:00:03	13.6000003814697	10.1303511602485
35	2017-06-28 08:08:03	13.3999996185303	9.92140567382966
35	2017-06-28 08:09:03	13.1999998092651	9.89680777753783
35	2017-06-28 08:20:03	11.6000003814697	9.49137737927837
35	2017-06-28 08:26:03	11.3999996185303	9.0236192027946
35	2017-06-28 08:31:03	10.8999996185303	8.53610158616283
35	2017-06-28 08:35:03	10.3000001907349	8.12542452860891
35	2017-06-28 08:43:03	8.89999961853027	7.25709210028354
35	2017-06-28 08:51:03	7.90000009536743	6.34442872649166
35	2017-06-28 08:54:03	7.59999990463257	6.04059193113413
35	2017-06-28 09:03:03	6.30000019073486	5.25562226181062
35	2017-06-28 09:05:03	6.09999990463257	5.08405653348823
35	2017-06-28 09:11:03	5.5	4.65972712218388
35	2017-06-28 09:15:03	5.09999990463257	4.61783429560849
35	2017-06-28 09:20:03	4.69999980926514	4.96414347198931
35	2017-06-28 09:23:03	4.59999990463257	5.32271580095121
35	2017-06-28 09:26:03	4.59999990463257	5.71784492500906
35	2017-06-28 09:30:03	5.5	6.22436930353849
35	2017-06-28 09:32:03	6.19999980926514	6.45772701062425
35	2017-06-28 09:35:03	6.69999980926514	6.7825182437197
35	2017-06-28 09:36:03	6.90000009536743	6.88456746268622
35	2017-06-28 09:44:03	8.69999980926514	7.57610806088935
35	2017-06-28 09:47:03	9.30000019073486	7.75736303944204
35	2017-06-28 09:58:03	10.1000003814697	7.83378912901114
35	2017-06-28 09:59:03	9.89999961853027	7.79018484219971
35	2017-06-28 10:03:03	9.89999961853027	7.55822935014683
35	2017-06-28 10:07:03	9.5	7.29950096234181
35	2017-06-28 10:08:03	9.19999980926514	7.24227161887477
35	2017-06-28 10:14:03	8.5	7.07742612542188
35	2017-06-28 10:17:03	8.30000019073486	7.165473334005
35	2017-06-28 10:18:03	8.30000019073486	7.22626120131412
35	2017-06-28 10:20:03	8.39999961853027	7.39760895637727
35	2017-06-28 10:21:03	8.5	7.50819023430299
35	2017-06-28 10:26:03	8.89999961853027	8.28171093161987
35	2017-06-28 10:29:03	9.39999961853027	8.87063297218907
35	2017-06-28 10:31:03	10.3000001907349	9.28532194696566
35	2017-06-28 10:34:03	10.8999996185303	9.90449190136781
36	2017-06-29 07:20:02	16	15.1691494637554
36	2017-06-29 07:33:02	15.6999998092651	14.643563713238
36	2017-06-29 07:44:02	15.3999996185303	13.7340716592379
36	2017-06-29 07:55:02	15.1999998092651	13.4664001468876
36	2017-06-29 08:10:02	14.8999996185303	13.7647872478577
36	2017-06-29 08:22:02	14.3000001907349	13.6685280098414
36	2017-06-29 08:34:02	13.8999996185303	13.1650140908972
36	2017-06-29 08:45:02	13.8999996185303	12.7206885693847
36	2017-06-29 08:56:02	13.6999998092651	12.1969860267566
36	2017-06-29 09:10:02	12.1000003814697	11.4205137906411
36	2017-06-29 09:21:02	10.8000001907349	9.92762916821743
36	2017-06-29 09:32:02	9.30000019073486	8.46349084569747
36	2017-06-29 09:42:02	7.90000009536743	7.69233738197116
36	2017-06-29 09:54:02	6.40000009536743	6.73961764859205
36	2017-06-29 10:07:02	4.69999980926514	5.1712378977486
36	2017-06-29 10:17:02	3.90000009536743	4.01659145152098
36	2017-06-29 10:29:02	3.20000004768372	4.17098992180816
36	2017-06-29 10:40:02	4.30000019073486	5.23152650610739
36	2017-06-29 10:52:02	5.59999990463257	7.15029668479062
36	2017-06-29 11:03:02	7.59999990463257	8.5616645384843
36	2017-06-29 11:15:02	9.80000019073486	9.8291462087826
36	2017-06-29 11:25:02	11	10.6904126562678
36	2017-06-29 11:37:02	12.1000003814697	11.5556860392972
36	2017-06-29 11:53:02	12.1000003814697	11.0627246923136
36	2017-06-29 12:03:02	11.3999996185303	10.489514792525
36	2017-06-29 12:13:02	10.3000001907349	9.76691891648221
36	2017-06-29 12:23:02	9.60000038146973	9.01267114117183
36	2017-06-29 12:34:02	8.39999961853027	8.55818915023206
36	2017-06-29 12:47:02	8.10000038146973	7.98522971299697
37	2017-06-29 06:54:21	5	4.70287783244683
37	2017-06-29 06:56:21	5.09999990463257	4.57384169322827
37	2017-06-29 07:06:21	4.5	4.2433744047276
37	2017-06-29 07:16:21	4.69999980926514	4.43763853211396
37	2017-06-29 07:28:21	4.90000009536743	5.06349341545177
37	2017-06-29 07:39:21	5.19999980926514	4.73867725424796
37	2017-06-29 07:52:21	4.90000009536743	4.47422415533957
37	2017-06-29 08:05:21	4.80000019073486	5.20214449090542
37	2017-06-29 08:16:21	5.59999990463257	5.7916574405233
37	2017-06-29 08:27:21	6.30000019073486	6.59931274216787
37	2017-06-29 08:40:21	7.90000009536743	7.84238568101135
37	2017-06-29 08:54:21	9.89999961853027	9.78500181320741
37	2017-06-29 09:05:21	11.3999996185303	10.4409500663015
37	2017-06-29 09:10:21	11.6999998092651	10.2087809617896
37	2017-06-29 09:14:21	11.8000001907349	9.84598881361107
37	2017-06-29 09:18:21	11.6000003814697	9.40942615389561
37	2017-06-29 09:19:21	11.6000003814697	9.29642162844613
37	2017-06-29 09:31:21	9.19999980926514	7.90709211215492
37	2017-06-29 09:37:21	8.5	7.12337642978936
37	2017-06-29 09:43:21	7.40000009536743	6.28187562273684
37	2017-06-29 09:54:21	5.69999980926514	4.91088601066204
37	2017-06-29 10:06:21	5.09999990463257	4.50343734282524
37	2017-06-29 10:17:21	4.90000009536743	5.21448034693627
37	2017-06-29 10:26:21	5.59999990463257	5.84827282283862
37	2017-06-29 10:28:21	5.90000009536743	5.97146105917302
37	2017-06-29 10:35:21	6.90000009536743	6.37799133794799
37	2017-06-29 10:40:21	7.30000019073486	6.6642705468056
37	2017-06-29 10:51:21	8.30000019073486	7.31633192724535
37	2017-06-29 11:02:21	8.80000019073486	7.89281885463416
37	2017-06-29 11:03:21	8.89999961853027	7.93386125803782
37	2017-06-29 11:15:21	9.69999980926514	8.3490387838958
37	2017-06-29 11:17:21	9.80000019073486	8.42811697331385
37	2017-06-29 11:22:21	9.89999961853027	8.6536378652094
37	2017-06-29 11:26:21	10.1000003814697	8.84648827196388
37	2017-06-29 11:31:21	10.3999996185303	9.07396292863362
37	2017-06-29 11:39:21	10.8000001907349	9.37574459409806
37	2017-06-29 11:41:21	11.1000003814697	9.44099991156597
37	2017-06-29 11:44:21	11.3000001907349	9.5358215411155
37	2017-06-29 11:51:21	11.8000001907349	9.76845483887613
38	2017-06-30 07:08:10	22.8999996185303	19.9873487531903
38	2017-06-30 07:21:10	23.7999992370605	23.1503727566089
38	2017-06-30 07:34:10	25.6000003814697	24.7020148836021
38	2017-06-30 07:49:10	26.7000007629395	25.2355755506855
38	2017-06-30 08:00:10	27.7999992370605	24.8685105341732
38	2017-06-30 08:01:10	27.7999992370605	24.8207298513253
38	2017-06-30 08:14:10	27.7999992370605	24.2927525025698
38	2017-06-30 08:25:10	27.7999992370605	24.0031518569798
38	2017-06-30 08:35:10	26.8999996185303	23.4468122581566
38	2017-06-30 08:45:10	26.2000007629395	22.533611013974
38	2017-06-30 08:57:10	25.2999992370605	21.4628537019829
38	2017-06-30 09:06:10	24.7999992370605	20.8862382593492
38	2017-06-30 09:17:10	23.2000007629395	20.1555623796505
38	2017-06-30 09:27:10	22	19.0122138245206
38	2017-06-30 09:37:10	20.7000007629395	17.4956697404328
38	2017-06-30 09:47:10	19.3999996185303	16.0278818363271
38	2017-06-30 09:57:10	17.2999992370605	14.4041644763952
38	2017-06-30 10:09:10	14.8000001907349	12.3191738427996
38	2017-06-30 10:21:10	12.5	10.7433976016956
38	2017-06-30 10:33:10	10.6999998092651	9.25530181135595
38	2017-06-30 10:45:10	7.90000009536743	7.64555768713315
38	2017-06-30 10:58:10	6.40000009536743	5.83306265208808
38	2017-06-30 11:08:10	5.30000019073486	4.8397638471745
38	2017-06-30 11:19:10	4.19999980926514	4.63560113132893
38	2017-06-30 11:29:10	4.5	4.98324501695184
38	2017-06-30 11:40:10	4.30000019073486	4.30266425783317
38	2017-06-30 11:50:10	3.70000004768372	4.38185212875445
38	2017-06-30 12:01:10	3.29999995231628	6.05776924695731
38	2017-06-30 12:11:10	4.5	7.22825953939148
38	2017-06-30 12:22:10	6.80000019073486	7.74219618162141
39	2017-06-30 08:18:12	9.10000038146973	7.92227178711812
39	2017-06-30 08:30:12	8.69999980926514	7.92167970127736
39	2017-06-30 08:42:12	8.5	7.38590210100931
39	2017-06-30 08:54:12	8.10000038146973	7.10598602878439
39	2017-06-30 09:04:12	7.80000019073486	6.7605318035026
39	2017-06-30 09:16:12	7.40000009536743	6.31469809609273
39	2017-06-30 09:28:12	6.80000019073486	5.76245125153225
39	2017-06-30 09:38:12	6.90000009536743	5.34842688293199
39	2017-06-30 09:48:12	6.19999980926514	4.82430247152871
39	2017-06-30 09:58:12	5.80000019073486	5.29660079637381
39	2017-06-30 10:07:12	5.90000009536743	6.95373653126694
39	2017-06-30 10:17:12	6.5	8.64280819331719
39	2017-06-30 10:28:12	7.5	10.2922145199845
39	2017-06-30 10:39:12	8.69999980926514	11.7464836971505
39	2017-06-30 10:49:12	9.19999980926514	12.5791863548672
39	2017-06-30 11:00:12	10.6000003814697	12.517179523542
39	2017-06-30 11:10:12	10.8000001907349	11.8658030011976
39	2017-06-30 11:19:12	11.1999998092651	11.1730792765945
39	2017-06-30 11:30:12	10.6999998092651	10.3787619833743
39	2017-06-30 11:40:12	10.1000003814697	9.3907483449917
39	2017-06-30 11:42:12	10.1000003814697	9.11641523471459
39	2017-06-30 11:52:12	9.30000019073486	7.86545286653571
39	2017-06-30 12:03:12	8.80000019073486	7.48904822658667
39	2017-06-30 12:14:12	8.19999980926514	7.01828180215028
39	2017-06-30 12:23:12	7.30000019073486	6.300868820321
39	2017-06-30 12:34:12	6.80000019073486	5.87947439818337
39	2017-06-30 12:43:12	6.09999990463257	5.48344709960879
39	2017-06-30 12:53:12	5.59999990463257	4.82716325887984
